# Supplementary material for: Application of Homology Modeling by Enhanced Profile–Profile Alignment and Flexible-Fitting Simulation to Cryo-EM Based Structure Determination
Source: MDPI journal article supplement (doi:10.3390/ijms23041977), 2022-02-10
Supplement: s1 [file s1]

## Supporting Information

### 1. Modeling of the a-subunit of *Thermus thermophilus* V/A-ATPase

As another demonstration of the performance which can be achieved using our method, modeling of the a-subunit of *Thermus thermophilus* V/A-ATPase (*T. thermophilus* V-ATPase) was performed based on currently available EM maps. The overall structure of *T. thermophilus* V-ATPase has been ascertained already using cryo-EM techniques with multiple resolution. We compared the existing PDB structure (reference structure) with the model generated from the viewpoint of fitness with EM-maps. Among the known structures of the a-subunit, the chain N of 5Y5X (PDB ID code), which was found based on EM map (EMD-6810) with 5.0 Å resolution [1], was selected as the reference structure. This choice was executed because our method specifically examines modeling based on EM data with medium resolution. First, the sequence of the a-subunit of *T. thermophilus* V-ATPase (UniProt accession number: Q5SIT6) was divided into two regions: residues of 1–310 (domain I) and residues of 311–652 (domain II). Our homology modeling pipeline was applied to domains I and II without information of these known structures. The most recent data of the used template were published in January 2018. The PDB structures for the 2016 paper [2] were also excluded from the template database. After scoring and ranking the models generated for each domain, the alignments corresponding to the high-scoring models were selected for both domains. Then, full-length models were newly generated with a chimeric template based on selected alignment combinations using MODELLER, with addition of secondary structure restraint based on prediction of RaptorX-property. The templates at this stage were unique for their respective domains: 3RRK for domain I and 5TJ5 for domain II. Then, whole models were subjected again to scoring and ranking based on the structure score and the CCC calculated using Colores to the EM map. Next, the higher-ranked models were subjected to the same procedure with the case of human TPC2 of flexible fitting using cryo\_fit2 and evaluation. The ranges of TM-score for higher-ranked structures, which were up to 0.7, directly reflect that structure models generated by the pipeline are similar to the reference structure. However, the CCC values are still low (up to about 0.4 at most), even for structure models with a high TM-score, indicating a need for a flexible-fitting simulation. Finally, the model with the highest values of  $CC_{\text{mask}}$  was compared with the reference structure (Table S1). The SMOCs per residue were also calculated for both the reference structure and for our model (Figure S1). Values in the table and figure show that our model approaches the reference structure in terms of the TM-score and CCC. From the viewpoint of fitting to the EM map, our model shows improvement for CC-related values. Consideration of Figure S1 indicates that our model is superior to the reference structure in terms of fit to the EM map, except for the residues in regions such as 270–276, and 420–440. These areas are loop regions highlighted in Figure S2.

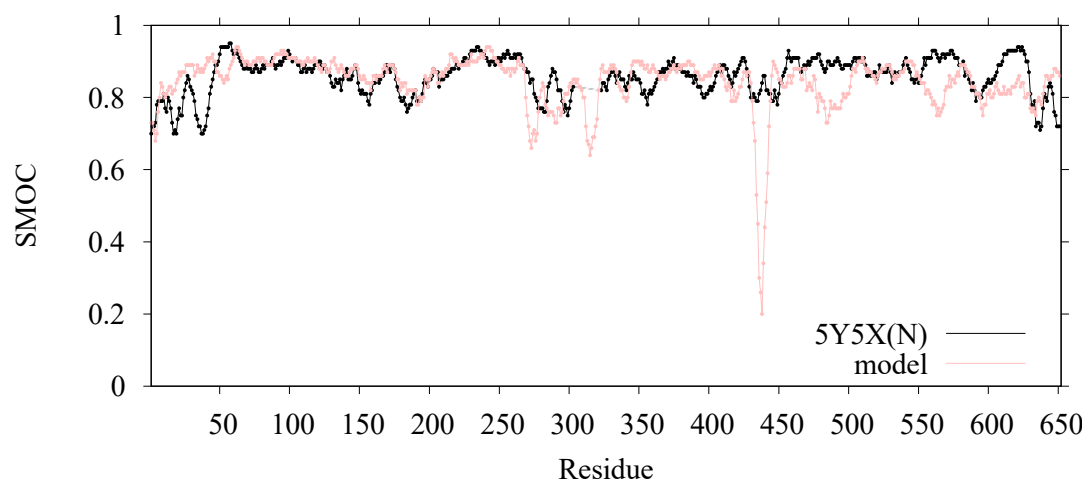

Figure S1. SMOC calculated using TEMPy for 5Y5X and our model: black corresponds to 5Y5X; pink corresponds to our model.

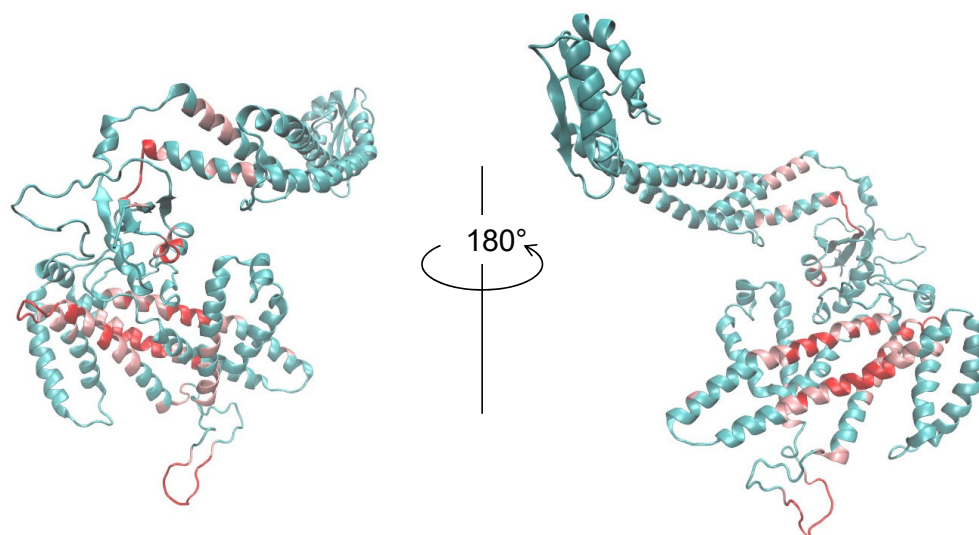

Figure S2. Our model of  $\alpha$ -subunit of *T. thermophilus* V-ATPase, the region in which our model SMOC values are lower than PDB structure is highlighted (red regions are lower than pink).

Table S1. Scores of 5Y5X and our model of a-subunit of *T. thermophilus* V-ATPase: CC<sub>mask</sub>, CC<sub>volume</sub>, CC<sub>peaks</sub>, and CC<sub>box</sub> were calculated using the map\_model\_cc module in Phenix. Correlation was calculated using the fit\\_in\\_map module in Chimera. The value of SMOC for every residue was calculated based on values obtained using TEMPy.

|                          | 5Y5X    | model   |
|--------------------------|---------|---------|
| CC <sub>mask</sub>       | 0.4220  | 0.5803  |
| CC <sub>peak</sub>       | -0.1252 | -0.1318 |
| CC <sub>volume</sub>     | 0.4900  | 0.5814  |
| CC <sub>box</sub>        | 0.2718  | 0.3437  |
| Correlation (fit in map) | 0.841   | 0.847   |
| CCC                      | 0.270   | 0.473   |
| SMOC (avg.)              | 0.857   | 0.844   |
| TMscore with 5Y5X        | 1.000   | 0.7542  |

#### References

1. Nakanishi, A.; Kishikawa, J.; Tamakoshi, M.; Mitsuoka, K.; Yokoyama, K. Cryo EM structure of intact rotary H<sup>+</sup>-ATPase/synthase from *Thermus thermophilus*. *Nat. Commun.* **2018**, *9*, 89.
2. Schep, D. G.; Zhao, J.; Rubinstein, J.L. Models for the a subunits of the *Thermus thermophilus* V/A-ATPase and *Saccharomyces cerevisiae* V-ATPase enzymes by cryo-EM and evolutionary covariance. *Proc. Natl. Acad. Sci.* **2016**, *113*, 3245–3250.

## 2. Comparison with a model generated using AlphaFold2

In support of our discussion, we present the modeling of AlphaFold2(AF2) for the same target of our method in the sense of global and local fitness to the EM map. For human TPC2, we performed AF2 modeling using AF2 ver. 2.00 and compared how the model fits to the EM map and how it is similar to the reference structure (PDB ID code: 6NQ1). The parameters of AF2 used for obtaining the monomer of TPC2 were “-max\_template\_date 2018-05-01” and -preset “full\_dbs”. We duplicated the monomer for building the homodimer based on the location of the PDB structure 6NQ1. This setting can be a favorable condition for the AF2 model (and might be concessional for us) because knowledge after the structure determination was used for the placement of two AF2-generated models. Then the same procedures of the flexible-fitting simulation and analyses were applied to the AF2 model. The values of goodness-of-fit to the EM map and of similarity with the PDB structure of the AF2 model after flexible fitting were found to be comparable with ours, as presented in Table S2. The local fitness measured as the SMOC value is also shown as the following Figure S3. Regions in which the SMOC value of the AF2 model after flexible fitting is lower than the value of the reference structure (such as residue is 315 to 330 for both chains) are highlighted in Figure S4. These results indicate that even the state-of-the-art approach requires flexible-fitting simulation to improve goodness-of-fit to an EM map. It might not reach a model (6NQ1 in this case) obtained by manually adjusted modeling using Coot based on an EM map with high-resolution. This finding implies that model-building into cryo-EM maps, especially for protein complexes remains as a frontier.

Table S2. Scores of 6NQ1, our model and AF2 model (before/after flexible-fitting simulation) of T0984o for CASP13:  $CC_{\text{mask}}$ ,  $CC_{\text{volume}}$ ,  $CC_{\text{peaks}}$ , and  $CC_{\text{box}}$  were calculated using the map\_model\_cc module in PHENIX. Correlation was calculated using the fit\_in\_map module in Chimera. The value of SMOC over every residue was calculated based on the values obtained using TEMPy.

|                            | 6NQ1  | Our Model<br>(No Fit.) | Our Model<br>(Fit.) | AF2 Model | AF2 Model<br>(Fit.) |
|----------------------------|-------|------------------------|---------------------|-----------|---------------------|
| $CC_{\text{mask}}$         | 0.823 | 0.284                  | 0.755               | 0.439     | 0.757               |
| $CC_{\text{volume}}$       | 0.794 | 0.322                  | 0.713               | 0.439     | 0.715               |
| $CC_{\text{peak}}$         | 0.516 | 0.083                  | 0.468               | 0.236     | 0.475               |
| $CC_{\text{box}}$          | 0.585 | 0.300                  | 0.557               | 0.398     | 0.560               |
| Correlation(fit<br>in map) | 0.858 | 0.661                  | 0.829               | 0.740     | 0.843               |
| CCC                        | 0.593 | 0.445                  | 0.566               | 0.516     | 0.569               |
| SMOC(ave.)                 | 0.850 | 0.628                  | 0.811               | 0.688     | 0.803               |
| TMscore                    | 1.000 | 0.916                  | 0.930               | 0.957     | 0.982               |

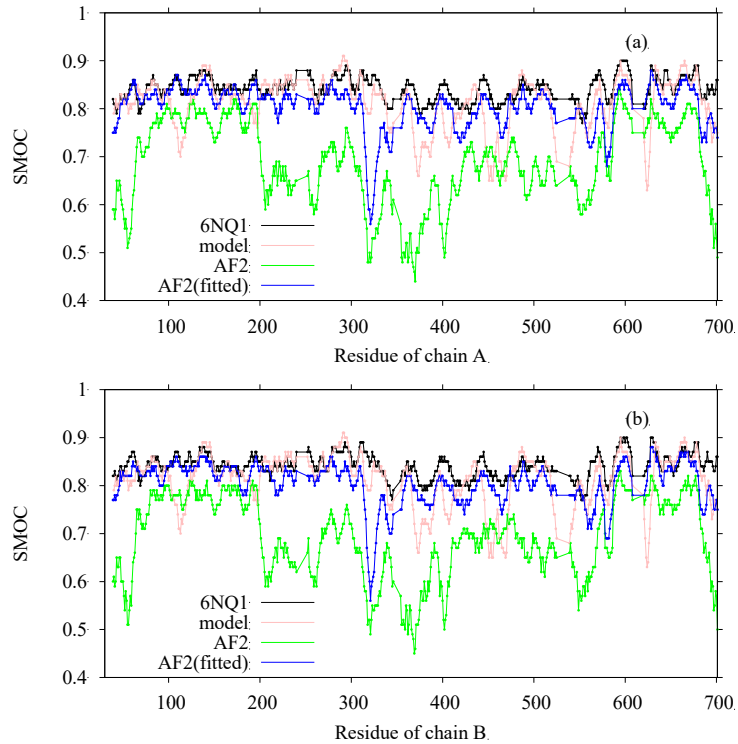

Figure S3. SMOC calculated using TEMPy for 6NQ1, our model, AF2 model and AF2 model after flexible-fitting simulation for (a) chain A and (b) chain B. Black corresponds to 6NQ1. Pink corresponds to our model. Green and blue lines respectively correspond to AF2 models before and after flexible fitting.

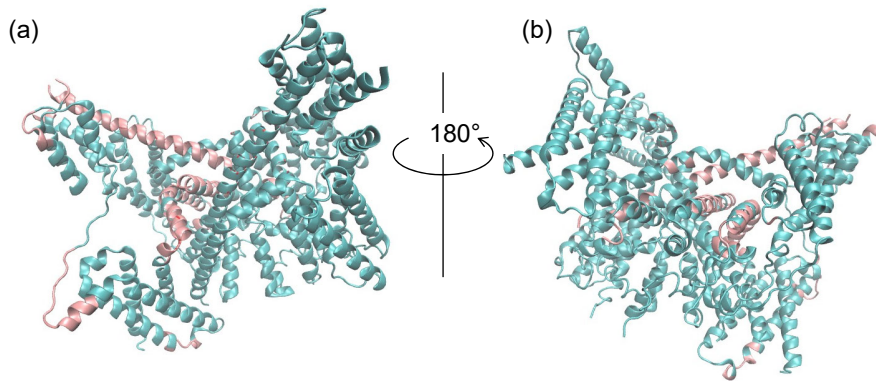

Figure S4. AlphaFold2-generated model after flexible-fitting simulation. Regions in which the SMOC value of AF2 model after flexible fitting is lower than the value of the reference structure are highlighted in pink.

## Alignment used for the modeling of human TPC2

```

T0984 -----ARNDLCIDQAVVFIEDAIQY-RSINHRVDASSMWLYRRYYSNVQRTLSFTIFLILFLAFIETPSSLTSTADVRYRAAPWEPPCGLTESVEVLGL
6C96 -----HNWEMNYGEAAIYLQEGQNDKFFTHPKDARALAAAYLFVHNHFFYMMELLTALLLLLLSLCESPA-----VPVLKLHTYVHATLELFAL
6C9a -----HNWEMNYGEAAIYLQEGQNDKFFTHPKDARALAAAYLFVHNHFFYMMELLTALLLLLLSLCESPA-----VPVLKLHTYVHATLELFAL

T0984 LVFAADLSVKGYLFGWAHFQKNLWLLGYLVLVSLVDWTVSL--SLVCHPELRIRRLRPFFLLQNSSMMKTKICIRWSLPEMASVGLLLAIHLCLFTMFGMLLFAGGQDDGQDRERLTYFQNLPESLTSLVLLTTANNPDVMIIPAYSKNRAYAIF
6C96 MVVVFELCMKLRWLGFHTFVRHKRTMVKTSVLVQGFIEAIVLVVRQTSHVRVTRALRCIFLVD-CRYCGGVRRLRQIFQSLPPFMDILLLLFFMIIFAILGFYLFST-----NPSDPYFSTLENSIVNLFVLLTTANFPDVMMPYSYRNPNWSCVF
6C9a MVVVFELCMKLRWLGFHTFVRHKRTMVKTSVLVQGFIEAIVLVVRQTSHVRVTRALRCIFLVD-CRYCGGVRRLRQIFQSLPPFMDILLLLFFMIIFAILGFYLFST-----NPSDPYFSTLENSIVNLFVLLTTANFPDVMMPYSYRNPNWSCVF

T0984 FIVFTVIGSLFLMNLTAIIYSQFRGYLMKSLQTSLFRRLGTRAAFEVLSSMVGEGGAFFQAVGKPKQNLQVLQ--KVQLDSSHQAMMEKVRYSYGSVLLSAEEFQKLFNELDRSVVKEH-----PPRPEYQSPFLQSAQFLFGHYFYDYLGNLIAL
6C96 FIVYLSIELYFIMNLLAVVDFTFNDIEKHFKSLLHKRTAIQHAYGLLASORRPA-----GISYRQFEGLMRFYKPRMSARERLTFKALNQSNTPLLSLKDFYDIYEVAALQWAKNRQHWFDELPRTAFLIFKGINILVNSKAFQYFMYLVVA
6C9a FIVYLSIELYFIMNLLAVVDFTFNDIEKHFKSLLHKRTAIQHAYGLLASORRPA-----GISYRQFEGLMRFYKPRMSARERLTFKALNQSNTPLLSLKDFYDIYEVAALQWAKNRQHWFDELPRTAFLIFKGINILVNSKAFQYFMYLVVA

T0984 ANLVSICVFLVDADVLPARDDFILG-ILNCVFIYYLLEMLLKVFALGLRGYLSYPSNVFDGLLTVLLVLEISTLAVYRLPHPGWRPEMVGLLSLWDMTRMLNMLIVFRFLRIIPSMKLMVVASTVLGLVQNMRAFGGILVVVVYVFAIIGINLFR
6C96 VNGVWILVET---FMLKGGNFTSKHVPWSYLVFLTIYGVELFMKVAGLGPVEYLSGGWNLDFSVTAFAFLGLLALTINMEP-----FYFIVVLRPLQLRLFKLKKR---YRNVLDTMFELLPRMASLGLTLTFYYSFAIVGMEFFN
6C9a VNGVWILVET---FMLKGGNFTSKHVPWSYLVFLTIYGVELFMKVAGLGPVEYLSGGWNLDFSVTAFAFLGLLALTINMEP-----FYFIVVLRPLQLRLFKLKKR---YRNVLDTMFELLPRMASLGLTLTFYYSFAIVGMEFFN

T0984 GVIVALPGNSSLAPANGSAPCGSF-----EQLEYWANNFDDFAALVTLWNLMVNVNQVFLDAYRRYSGPWSKIYFVLWLVSSVIWNLFALILENFL-----
6C96 GRLTPNCNTSTVADAYRFINHTVGNKTKVEEGYYLNNFDNILNSFVTLFELTVVNNWYIIMEGVTSTQSHWSRLYFMTFYIVTMVVMT-IIVAFILEAFVFRMNSRK-----SGIVIEKEMSKEELMAVLELYREERGTSDDVTRLLDLSOMEK
6C9a GRLTPNCNTSTVADAYRFINHTVGNKTKVEEGYYLNNFDNILNSFVTLFELTVVNNWYIIMEGVTSTQSHWSRLYFMTFYIVTMVVMT-IIVAFILEAFVFRMNSRK-----SGIVIEKEMSKEELMAVLELYREERGTSDDVTRLLDLSOMEK

T0984 -----HKWDPR-----/
6C96 YQGNMVFLLGRRSRKSDLCLKMYQEEIQEWYEEHAREGEQQLRH-----/
6C9a YQGNMVFLLGRRSRKSDLCLKMYQEEIQEWYEEHAREGEQQLRH-----/

T0984 -----ARNDLCIDQAVVFIEDAIQY-RSINHRVDASSMWLYRRYYSNVQRTLSFTIFLILFLAFIETPSSLTSTADVRYRAAPWEPPCGLTESVEVLGL
6C96 -----NWEMNYGEAAIYLQEGQNDKFFTHPKDARALAAAYLFVHNHFFYMMELLTALLLLLLSLCESPA-----VPVLKLHTYVHATLELFAL
6C9a -----NWEMNYGEAAIYLQEGQNDKFFTHPKDARALAAAYLFVHNHFFYMMELLTALLLLLLSLCESPA-----VPVLKLHTYVHATLELFAL

T0984 LVFAADLSVKGYLFGWAHFQKNLWLLGYLVLVSLVDWTVSL--SLVCHPELRIRRLRPFFLLQNSSMMKTKICIRWSLPEMASVGLLLAIHLCLFTMFGMLLFAGGQDDGQDRERLTYFQNLPESLTSLVLLTTANNPDVMIIPAYSKNRAYAIF
6C96 MVVVFELCMKLRWLGFHTFVRHKRTMVKTSVLVQGFIEAIVLVVRQTSHVRVTRALRCIFLVD-CRYCGGVRRLRQIFQSLPPFMDILLLLFFMIIFAILGFYLFST-----NPSDPYFSTLENSIVNLFVLLTTANFPDVMMPYSYRNPNWSCVF
6C9a MVVVFELCMKLRWLGFHTFVRHKRTMVKTSVLVQGFIEAIVLVVRQTSHVRVTRALRCIFLVD-CRYCGGVRRLRQIFQSLPPFMDILLLLFFMIIFAILGFYLFST-----NPSDPYFSTLENSIVNLFVLLTTANFPDVMMPYSYRNPNWSCVF

T0984 FIVFTVIGSLFLMNLTAIIYSQFRGYLMKSLQTSLFRRLGTRAAFEVLSSMVGEGGAFFQAVGKPKQNLQVLQ--KVQLDSSHQAMMEKVRYSYGSVLLSAEEFQKLFNELDRSVVKEH-----PPRPEYQSPFLQSAQFLFGHYFYDYLGNLIAL
6C96 FIVYLSIELYFIMNLLAVVDFTFNDIEKHFKSLLHKRTAIQHAYGLLASORRPA-----GISYRQFEGLMRFYKPRMSARERLTFKALNQSNTPLLSLKDFYDIYEVAALQWAKNRQHWFDELPRTAFLIFKGINILVNSKAFQYFMYLVVA
6C9a FIVYLSIELYFIMNLLAVVDFTFNDIEKHFKSLLHKRTAIQHAYGLLASORRPA-----GISYRQFEGLMRFYKPRMSARERLTFKALNQSNTPLLSLKDFYDIYEVAALQWAKNRQHWFDELPRTAFLIFKGINILVNSKAFQYFMYLVVA

T0984 ANLVSICVFLVDADVLPARDDFILG-ILNCVFIYYLLEMLLKVFALGLRGYLSYPSNVFDGLLTVLLVLEISTLAVYRLPHPGWRPEMVGLLSLWDMTRMLNMLIVFRFLRIIPSMKLMVVASTVLGLVQNMRAFGGILVVVVYVFAIIGINLFR
6C96 VNGVWILVET---FMLKGGNFTSKHVPWSYLVFLTIYGVELFMKVAGLGPVEYLSGGWNLDFSVTAFAFLGLLALTINMEP-----FYFIVVLRPLQLRLFKLKKR---YRNVLDTMFELLPRMASLGLTLTFYYSFAIVGMEFFN
6C9a VNGVWILVET---FMLKGGNFTSKHVPWSYLVFLTIYGVELFMKVAGLGPVEYLSGGWNLDFSVTAFAFLGLLALTINMEP-----FYFIVVLRPLQLRLFKLKKR---YRNVLDTMFELLPRMASLGLTLTFYYSFAIVGMEFFN

T0984 GVIVALPGNSSLAPANGSAPCGSF-----EQLEYWANNFDDFAALVTLWNLMVNVNQVFLDAYRRYSGPWSKIYFVLWLVSSVIWNLFALILENFL-----
6C96 GRLTPNCNTSTVADAYRFINHTVGNKTKVEEGYYLNNFDNILNSFVTLFELTVVNNWYIIMEGVTSTQSHWSRLYFMTFYIVTMVVMT-IIVAFILEAFVFRMNSRK-----SGIVIEKEMSKEELMAVLELYREERGTSDDVTRLLDLSOMEK
6C9a GRLTPNCNTSTVADAYRFINHTVGNKTKVEEGYYLNNFDNILNSFVTLFELTVVNNWYIIMEGVTSTQSHWSRLYFMTFYIVTMVVMT-IIVAFILEAFVFRMNSRK-----SGIVIEKEMSKEELMAVLELYREERGTSDDVTRLLDLSOMEK

T0984 -----HKWDPR-----
6C96 YQGNMVFLLGRRSRKSDLCLKMYQEEIQEWYEEHAREGEQQLR-----
6C9a YQGNMVFLLGRRSRKSDLCLKMYQEEIQEWYEEHAREGEQQLR-----

```

[illegible]

## Alignment used for the modeling of the a-subunit of *Eh* V-ATPase

```

Target  MAVTKMEKVTLLISDKKNREILLQAVOGLHAVEIRDLFQSENNQWVETFFPEPEMIDKDDELAKLSYKLTDIRTAIQFIEHHGKSKQKQHLKRRELSLDTLEKNYSE--EAFSKKLEEVLLLKEQWEQLVDERQQLEDQENWLLNWNQNLDLAPKAFDSQ
5Y5XN   --MIAPMEKLVLAGPKGRAKELLQSLQOAGVVHLETLRPEALSAY-----QLSPEERAELRRWEAVSAGAHTLSLLGLEAEP-----ARPFPEGLEAAEKALSPIQAHAEGLTRQKQELEELALAQAYLEPLERLAALAHGLDKSPFL
Target  MTKLVIGTVNAKNAESFKAEEVAEINE--AYLEEINSSPTTTYFAYIVLRADESRMEEIASRYGFVKEDYLY---EGTPQQQLVAAKQSLQEIKDQKKLSSAIGACSGYIKD--FEWTEEIFLAREREAIKDRIIHTPYLILIQGWVDHEEKQELIHMLQN
5Y5XN   --RVIPFLLTEKELPLVEEALKALEDRYLLAHEAYAGGVAALVVHRKEVDQAKAALSRAOVAELRPGALGELPLSEAAARLKERAAPRELSEVRQHLAKLARESASTLQSLWTRAQDEVARLKALEELASGRFGFALLGYVPVKAKPKVEEALAR
Target  ILASEEVYLTDFDEPTDNEIAEEVPTKLKNHPIVAPFEMLTMYSLPKYEEVDPTWMMPFYLVFFGMMVADIGYGLLMFLGAFLLQKLVVLPGRM-----QRFAKFFEILAIPSIIWGFIIYSSFFGAALPKEIFGIIHLPFI-----L
5Y5XN   HKESV--VYAFEPVDEHHEADRIPVVLNPNWAKPFELLVSFLNTPKYGTDPVTPVPVFFPWFWMIVGDIYALLFYLVGRWLSGYVKRNEPLVIDLFALKLKPQVIGKLVHILNMMVFWTVVWGVIIYGEFFGTFLHGLGVFGTPEHPGLIPIIHR
Target  STDDVNTILILSVIFGLIQILVGLFIAAKEHIIKRKAYDAVNDGFAWQGI LLGIILILLGTMILKNNAFVYLGALAVLSAVGILIIIPVFQSSSKAKGIAKGAYNLYGLTGYIGDLVSYTRLMALGISGGSIAAAFNMLVAFMPPA---ARFSVGILLI
5Y5XN   DTAKTANILLLSVAFGVVLVFFGLALRAYLGLKHRHMAHFII--EGVGYLGGVLGVLAALASYLGNLQAGWL--QGLMYLGFVGFLLAVL-----MSRIWLMIPFIPTQAGHILSHIRIYAVGAAGGILAGLLTDVGFAAERLGLLVLLGLLVA
Target  IVLQALNMFLLTLLSAYVHGARLQYVEFFGK--FYTGGGRSFKPLKTVEKYVNIHKKK
5Y5XN   GVLHLLILLTTLGHMLQPIRLLVVEFFTKFGFYENGPRYPFKSVREAQ-----

```

## Alignment used for the modeling of the d-subunit of *Eh* V-ATPase

```

Target  -----RELELISKDTFEQMIQTDSIDSLGEILQSTIYQPYIYDGFDKDFEANLSQERSKLFQWLKESAPE--
1r5z    --DDFAYLNARVRVRGTLTKESFFQEALDL--SFADFLRLSETVYGGELAGQGLPDVDRAVLRTQAKLVGDLPRLVGTGE
Target  -PEIVWIIYTMRYTFHNLKVLTKAEITGQNLDHLYIHDGFYSLEVLDKDAIHTQVSVELPDSLM----DYIREVHEYCEEST
1r5z    AREAVRLLLLRNDLHNLQALLRAKATGRPFEEVLLPGTLREEVWRQAYEAQDPAGMAQVLAVPGHPLARALRAVLRETQ
Target  ILQGIDVIYDRCFLTEQRRLGEQLGYPELLEEIIAFIDLTNITTTARGILQHRSAFMTTVISSSGSI--PKDTLLSFVRG
1r5z    DLARVEALLAKRFFEDVAKAAKGLDQPALRDYLALEVDAENLRTAFKLQGSGLAPDAF----FLKGGRFVDRVRFARLMEG
Target  EMASFTQFLLTTDYSELLQKQVIEHEEQIDLVSLEQLKDDYSSFYQVAQTQAFGPLLLAFLNAKEVESKNLRLLIIGKRN
1r5z    D--YAVLDELSGTPFS-----GLSGVR-DLKALERGLRCVLLKEAKGVQDPLGVGLVLA YVKEREWEAVRLRLARRAY
Target  HFSLEQLKERM---
1r5z    GLPRAQVEEEVVC--

```



# Alignment used for the modeling of the E-subunit of *Eh* V-ATPase

```

Target  -----ERASFEEMKRKEIDQKFEVKKWQIEADFQKEKASKLEEIERSYRQLRNKQKMQ
4dt0    -----KIEYILNEARQQAEEKIEEARRNAEAKAEWIIRRAKTQAELEKQRIIANARLE
Target  VKQEILNAKQEVLRQLFTEATLQLENPKKEQLALMKQMIQTLPI---NGTARLIPGEKSADILTPAVIAEWNEELP-FE
4dt0    VRRKRLAIQEEIISVLEEVRRLTMSDEYFESVKALLKEAIKELNEKKVRVMSNEKTLGLIAS-RIEEIKSELGDVS
Target  LIREDFTEKAQAGLIID--DAGIQYNFLFSHLIKEIQETMSAEIAKELFD
4dt0    IEL-GETVDTMGGVIVETEDGRIRIDNTFEARMERFEGEIRSTIAKVLFG

```

## Alignment used for the modeling of the G-subunit for stalk A of *Eh* V-ATPase

```

Target  -IKEAEENNQKKEEQVKAELAQYEQLKNNELIDLNKEFQERLTKLMKEKRKNEEVTEDEQHKLLEILEQFRQKVLIEK
3hdr    KQALSEIETRHSIIKLENSIRELHDMFMDMAMLVESQGEMIDRIEYNVEHAVDYVERAVSDTKKAVKYQSKARRKKIMI
Target  TYLEKEEEEIAKKKNLTNEII
3hdr    IICCVILGIIIASTIGGI---

```

## Alignment used for the modeling of the G-subunit for stalk B of *Eh* V-ATPase

```

Target  -----IKEAEENNQKKEEQVKAELAQYEQLKNNELIDLNKEFQERLTKLMKEKRKNEEVTEDEQHKLLEILE
2xnx    RLEKELEEKKEALELAIDQASRDYHRATALEKELEEKKKALELAIDQASQDYNRANVLEKELEAITREQEINRNLLGNAK
Target  QFRQKVLIEKTYLEKEEEEIAKKKNLTNEII
2xnx    LELDQLSSEKEQLTIEKAKLEEEKQIS-----

```
